# Plant detection and counting from high-resolution RGB images acquired from UAVs: comparison between deep-learning and handcrafted methods with application to maize, sugar beet, and sunflower

1 Etienne David<sup>1,\*</sup>, Gaëtan Daubige<sup>2</sup>, François Joudelat<sup>3</sup>, Philippe Burger<sup>4</sup>, Alexis Comar<sup>5</sup>,  
2 Benoit de Solan<sup>2</sup>, Frédéric Baret<sup>1</sup>

3 <sup>1</sup>INRAe, UMR EMMAH, Avignon, France

4 <sup>2</sup>Arvalis – Institut du végétal, Avignon, France

5 <sup>3</sup>ITB – Institut Technique de la Betterave, Paris, France

6 <sup>4</sup>INRAe, UE Grandes Cultures Auzeville (GCA), Toulouse, France

7 <sup>5</sup>Hiphen, 22b Rue Charrue, Avignon, France

8 \* **Correspondence:**

9 Corresponding Author

10 [etienne.david@inrae.fr](mailto:etienne.david@inrae.fr)

11 **Keywords: Plant counting, Deep-learning, Robustness, unmanned aerial vehicle, phenotyping.**  
12 **(Min.5-Max. 8)**

13 **Abstract**

14 Progresses in agronomy rely on accurate measurement of the experimentations conducted to improve  
15 the yield component. Measurement of the plant density is required for a number of applications since  
16 it drives part of the crop fate. The standard manual measurements in the field could be efficiently  
17 replaced by high-throughput techniques based on high-spatial resolution images taken from UAVs.  
18 This study compares several automated detection of individual plants in the images from which the  
19 plant density can be estimated. It is based on a large dataset of high resolution Red/Green/Blue (RGB)  
20 images acquired from Unmanned Aerial Vehicules (UAVs) during several years and experiments over  
21 maize, sugar beet and sunflower crops at early stages. A total of 16247 plants have been labelled  
22 interactively on the images. Performances of handcrafted method (HC) were compared to those of deep  
23 learning (DL). The HC method consists in segmenting the image into green and background pixels,  
24 identifying rows, then objects corresponding to plants thanks to knowledge of the sowing pattern as  
25 prior information. The DL method is based on the Faster Region with Convolutional Neural Network  
26 (Faster RCNN) model trained over 2/3 of the images selected to represent a good balance between  
27 plant development stage and sessions. One model is trained for each crop.

28 Results show that simple DL methods generally outperforms simple HC, particularly for maize and  
29 sunflower crops. A significant level of variability of plant detection performances is observed between  
30 the several experiments. This was explained by the variability of image acquisition conditions  
31 including illumination, plant development stage, background complexity and weed infestation. The  
32 image quality determines part of the performances for HC methods which makes the segmentation step  
33 more difficult. Performances of DL methods are limited mainly by the presence of weeds. A hybrid  
34 method (HY) was proposed to eliminate weeds between the rows using the rules developed for the HC  
35 method. HY improves slightly DL performances in the case of high weed infestation. When few images  
36 corresponding to the conditions of the testing dataset were complementing the training dataset for DL,

37 a drastic increase of performances for all the crops is observed, with relative RMSE below 5% for the  
38 estimation of the plant density.

## 39 1 Introduction

40 Measuring accurately traits is essential for numerous applications in agronomy, such as breeding or  
41 new farm management strategies evaluation. Plant density at emergence is a main yield component  
42 particularly for plants with reduced tillering or branching capacities such as maize, sugar beet and  
43 sunflower. The plant density at emergence is controlled by the seeding density and the emergence rate.  
44 Further, the seeding pattern defined by the distance between row and between plants influences the  
45 competition between plants and possibly with weeds. In addition to the estimation of plant density, the  
46 position of each plant can be documented to describe the local competitive environment (Godwin and  
47 Miller, 2003). For agronomical or phenotyping experiments, the plant density is mainly used to  
48 evaluate the quality of each microplot with consequences on the whole trial. It is also used by farmers  
49 to decide to stop spending resources to grow the crop in case of too low density or too much  
50 heterogeneity. Plant density is considered as an agronomical trait in some widely used ontology  
51 (Shrestha et al., 2012), despite not being directly governed by the genotype, as it results from the  
52 seeding density, seed vigor and the emergence conditions.

53 Plant density is assessed manually in current breeding programs. Operators count plants in the field  
54 over a limited sampling area, usually less than 1 square meter, since this process is tedious, time-  
55 consuming, and therefore expensive. Consequently, this traditional method can lead to significant  
56 uncertainties due to the limited representativeness of the sampled area and possible human errors.  
57 Further, the position of plants is generally not documented because it would be even more tedious to  
58 measure each plant location.

59 **Table 1: Comparison of the different approaches used for plant and organ counting referenced**  
60 **in the literature.** <sup>1</sup> random selection of samples for training and testing; <sup>2</sup>No proper calibration;  
61 <sup>3</sup>Calibrated with synthetic data; <sup>4</sup>Testing is made on two sessions, one session being already  
62 used for training

| #  | Study                              | UAV | Crop                             | Object | Sessions | Localiz<br>ation | Method    | Test<br>independency |
|----|------------------------------------|-----|----------------------------------|--------|----------|------------------|-----------|----------------------|
| 1  | (Guo et al., 2018)                 | Yes | Sorghum                          | Head   | 1        | Yes              | ML        | No <sup>1</sup>      |
| 2  | (Fernandez-Gallego et al., 2020)   | yes | Wheat                            | Plant  | 5        | yes              | ML        | No <sup>1</sup>      |
| 3  | (T. Liu et al., 2016)              | no  | Wheat                            | Plant  | several  | yes              | HC        | Yes <sup>2</sup>     |
| 4  | (Gnädinger and Schmidhalter, 2017) | yes | Maize                            | Plant  | 1        | yes              | HC        | yes <sup>2</sup>     |
| 5  | (Jacopin et al., 2021)             | yes | Sunflower                        | Plant  | 1        | yes              | HC        | Yes <sup>3</sup>     |
| 6  | (Calvario et al., 2020)            | yes | Agave                            | Plant  | 3        | yes              | HC        | No                   |
| 7  | (Torres-Sánchez et al., 2015)      | yes | Maize<br>Sunflower<br>wheat      | Plant  | 6        | no               | HC (OBIA) | Yes <sup>2</sup>     |
| 8  | (Josue Nahun Leiva et al., 2017)   | yes | Thuja                            | Plant  | 3        | yes              | HC (OBIA) | Yes <sup>2</sup>     |
| 9  | (Varela et al., 2018)              | yes | Maize                            | Plant  | 2        | yes              | HC (OBIA) | No <sup>1</sup>      |
| 10 | (Zhao et al., 2018)                | yes | Rapeseed                         | Plant  | 2        | yes              | HC (OBIA) | No <sup>1</sup>      |
| 11 | (Koh et al., 2019)                 | Yes | Safflower                        | Plant  | 2        | Yes              | HC (OBIA) | No <sup>4</sup>      |
| 12 | (Madec et al., 2019)               | No  | Wheat                            | Head   | 2        | yes              | DL        | Yes                  |
| 13 | (Quan et al., 2019)                | No  | Maize                            | Plant  | 10       | yes              | DL        | No <sup>1</sup>      |
| 14 | (Ribera et al., 2017)              | Yes | Sorghum                          | Plant  | 2        | no               | DL        | No <sup>1</sup>      |
| 15 | (Xiong et al., 2019)               | Yes | Wheat                            | Head   | several  | no               | DL        | Yes                  |
| 16 | (Valente et al., 2020)             | Yes | Spinach                          | Plant  | 1        | no               | DL        | No <sup>1</sup>      |
| 17 | (Liu et al., 2020)                 | Yes | Maize                            | Head   | 2        | yes              | DL        | No <sup>1</sup>      |
| 18 | (Lin and Guo, 2020)                | Yes | Sorghum                          | Head   | 2        | yes              | DL        | No <sup>1</sup>      |
|    | This study                         | Yes | Maize<br>Sugar beet<br>Sunflower | Plant  | 27       | yes              | HC / DL   | Yes                  |

63 The recent technological advances of plant phenotyping solutions including Unmanned Aerial Vehicles  
64 (UAV), sensors, computers, and image processing algorithms, offer potentials to develop alternative  
65 methods to the manual counting. Several authors already reported accurate estimates of plant or organ  
66 counting and density from RGB images (Table 1). Plants or organ can be characterized either with  
67 machine learning (ML) algorithms where standard local image features are extracted and a used in a  
68 supervised classification to identify the objects of interest (Guo *et al.*, 2018; Fernandez-Gallego *et al.*,  
69 2019). Handcrafted (HC) methods rely on expert knowledge to compute the pertinent features in a  
70 process known as “feature engineering” and use them to identify the objects of interest. Most of them  
71 belong to the Object Based Image Analysis (Josue Nahun Leiva *et al.*, 2017; Koh *et al.*, 2019; Torres-  
72 Sánchez *et al.*, 2015; Varela *et al.*, 2018; Zhao *et al.*, 2018). The identification process can be done  
73 based also on the expert knowledge (Gnädinger and Schmidhalter, 2017; Jacopin *et al.*, 2021; T. Liu  
74 *et al.*, 2016) or by calibrating a statistical model over a training dataset (Calvario *et al.*, 2020). More  
75 recently, approaches based on deep-learning (DL) have been proposed. The features are automatically  
76 extracted from the image and then used to identify and localize the individual objects of interest ((Lin  
77 and Guo, 2020; Liu *et al.*, 2020; Madec *et al.*, 2019; Quan *et al.*, 2019)). However, these features can  
78 also be used to estimate directly the density of objects through a regression (Ribera *et al.*, 2017; Valente  
79 *et al.*, 2020; Xiong *et al.*, 2019). Localization, is more popular (78% of the studies in Table 1) in plant  
80 phenotyping as it documents the sowing heterogeneity including missing plants, allowing to explore  
81 the competition between plants as outlined earlier. DL based methods are being common now to detect  
82 plant and organ and represent almost 30% of the localization studies (Table 1). Madec *et al.* (Madec *et al.*,  
83 2019) demonstrated that the Faster RCNN DL model (Ren *et al.*, 2015) provides accurate localization  
84 of wheat ears with higher robustness than previous methods, including direct regression method. A  
85 higher heritability than that of manual counting was also reported. More recently, (Lin and Guo, 2020;  
86 Liu *et al.*, 2020) applied similar strategies to locate plant and organ from UAV images. DL applications  
87 to plant phenotyping are supervised learning methods, requiring large and diverse labelled datasets to  
88 converge to a generic solution. The recent progress in DL applied to detection/localization tasks  
89 benefited from the availability of large image collections such as ImageNet (Deng *et al.*, 2009) and  
90 COCO Dataset (Lin *et al.*, 2014) that are used to pre-train the DL model.

91 However, Geiros *et al.* (Geirhos *et al.*, 2020) raised the overfitting risk and the resulting lack of  
92 robustness associated with most DL algorithms. They can reach excellent performances for datasets  
93 like those used for their calibration, while often failing when applied to cases different from the training  
94 dataset. In comparison, HC methods are based on expert knowledge which select the main features to  
95 identify the target objects. This reduces the risk of overfitting but can hardly account for all the specific  
96 cases. On the 11 methods listed (Table 1) that require a training dataset, only 3 (Koh *et al.*, 2019; Madec  
97 *et al.*, 2019; Xiong *et al.*, 2019) proposed a proper evaluation framework where the training and the test  
98 datasets do not come from the same acquisition sessions. This questions the accuracy, scalability and  
99 robustness of HC and DL methods that was investigated in the case of liver disease (Lin *et al.*, 2020),  
100 but not for the plant detection problem within phenotyping applications.

101 The objective of this study is to compare a HC approach based on the knowledge of the sowing and  
102 plant patterns and a DL approach based on object detection to localize plants and count them. This  
103 study includes three species (maize, sugar beet and sunflower) observed with a RGB (Red Green Blue)  
104 camera aboard a UAV during 27 acquisition sessions with plants at different development stages few  
105 weeks after emergence. This study appears therefore to be the most comprehensive one on the subject  
106 (Table 1), while keeping always the training and test datasets as independent as possible. Further, we  
107 will also propose to combine the DL approach with expert knowledge from the HC one.

## 108 2 Materials and methods

## 109 2.1 Dataset

### 110 2.1.1 Experiments

111 The dataset used was acquired over maize, sugar beet and sunflower experiments from 2016 to 2019  
 112 in several experimental sites in France (Table 2). The sites cover a large diversity of agronomic  
 113 conditions while managed with conventional tillage practices. However, some crop residues from the  
 114 previous season can be observed on few microplots. Generally, few weeds were present in the  
 115 microplots, except for some of them (Table 3). The sites include clay, brunisolic and limestone soil  
 116 types (Table 2) with a variety of surface roughness and moisture. The soil color varies from gray to  
 117 brown due to soil type, surface aspect and illumination conditions. Each site included an ensemble of  
 118 microplots corresponding to many genotypes from which 3 to 12 were selected to get approximately  
 119 600 plants (Table 3). Some sites were flown several times (Table 2), corresponding to several  
 120 acquisition sessions. This allows to get a larger variation in the crop development stage during image  
 121 acquisition (Table 3). For maize, a total of 51 microplots was available from 9 acquisition sessions  
 122 (Table 3) with contrasted microplot size, row spacing (0.3-1.1m), and plant density (5.1-11.2 plt.m<sup>-2</sup>).  
 123 For sugar beet, a total number of 60 microplots was available from 9 acquisition sessions with  
 124 microplot size, row spacing and plant density varying within a small range (Table 2). For sunflower, a  
 125 total of 78 microplots was available from 9 acquisition sessions with a large variability of microplot  
 126 size, row spacing, and plant density.

127 **Table 2: Characteristics of the crops for the several sites considered.**

| Crop       | Site Name      | Lat (°) | Long (°) | Year | Nb. sessions | Nb. microplots | Microplot width (m) | Microplot length (m) | Row spacing (m) | Plant density (plt.m <sup>-2</sup> ) | Soil type    |
|------------|----------------|---------|----------|------|--------------|----------------|---------------------|----------------------|-----------------|--------------------------------------|--------------|
| Maize      | Menainville    | 47.9    | 1.4      | 2016 | 1            | 6              | 2.2                 | 7.0                  | 1.10            | 5.1                                  | Clay         |
|            | Nerac          | 44.1    | 0.3      | 2016 | 1            | 8              | 1.6                 | 7.0                  | 0.80            | 8.5                                  | Clay         |
|            | Villedieu      | 47.8    | 1.5      | 2016 | 1            | 6              | 0.9                 | 11.0                 | 0.30            | 19.9                                 | Clay         |
|            | Thenay         | 47.3    | 1.2      | 2017 | 1            | 6              | 4.4                 | 6.0                  | 0.63            | 7.3                                  | Clay / Flint |
|            | Blois          | 47.7    | 1.2      | 2019 | 1            | 7              | 1.7                 | 7.0                  | 0.83            | 9.5                                  | Brunisolic   |
|            | Castetis       | 43.4    | -0.7     | 2019 | 1            | 5              | 2.8                 | 4.0                  | 0.70            | 11.2                                 | Brunisolic   |
|            | Ermine         | 46.5    | -1.0     | 2019 | 1            | 4              | 3.2                 | 5.5                  | 0.80            | 8.6                                  | Limestone    |
|            | Selommes       | 47.7    | 1.2      | 2019 | 1            | 7              | 1.8                 | 5.3                  | 0.88            | 9.5                                  | Brunisolic   |
|            | Pleinefougères | 48.5    | -1.5     | 2020 | 1            | 2              | 3.2                 | 11.0                 | 0.80            | 7.7                                  | Brunisolic   |
| Sugar beet | Bucy           | 49.6    | 3.9      | 2017 | 2            | 7              | 1.4                 | 6.2                  | 0.45            | 11.1                                 | Loam         |
|            | Charmont       | 48.3    | 4.1      | 2017 | 1            | 7              | 1.4                 | 5.5                  | 0.45            | 11.1                                 | Limestone    |
|            | Etienne        | 49.2    | 4.3      | 2017 | 1            | 6              | 1.2                 | 7.6                  | 0.40            | 15.6                                 | Limestone    |
|            | Memmie         | 48.9    | 4.3      | 2017 | 2            | 6              | 1.4                 | 7.6                  | 0.48            | 10.8                                 | Limestone    |
|            | Charmont       | 48.3    | 4.1      | 2018 | 2            | 8*             | 1.4                 | 5.5                  | 0.45            | 11.4                                 | Limestone    |
|            | Memmie         | 48.9    | 4.3      | 2018 | 1            | 6              | 1.4                 | 7.6                  | 0.45            | 11.4                                 | Limestone    |
| Sunflower  | Rivière        | 43.5    | 1.5      | 2017 | 1            | 8              | 3.0                 | 4.1                  | 0.50            | 7.1                                  | Clay         |
|            | Auzeville      | 43.5    | 1.5      | 2018 | 2            | 3              | 3.3                 | 9.5                  | 0.55            | 6.1                                  | Clay         |
|            | Auzeville      | 43.5    | 1.5      | 2019 | 5            | 12             | 2.9                 | 9.0                  | 0.96            | 3.7                                  | Clay         |
|            | Epoisses       | 47.2    | 5.1      | 2019 | 1            | 4              | 2.4                 | 10.0                 | 0.60            | 5.1                                  | Limestone    |

### 128 2.1.2 Acquisition and labelling details

129 Image acquisition was carried out by UAVs embarking three different RGB cameras including the  
 130 Sony Alpha 5100, Sony Alpha 6000, both with a resolution of 6024x4024 pixel, and the Zenmuse X7

131 (DJI) in the case of Epoisses site in 2019 with a resolution of 6016 x 4008 pixels. The cameras were  
 132 fixed on a two axes gimbal to maintain the nadir view direction during the flight. The camera was set  
 133 to speed priority of 1/1250 s to limit motion blur. The aperture and ISO were automatically adjusted  
 134 by the camera. The camera was triggered by an intervalometer set at 1Hz frequency corresponding to  
 135 the maximum value allowed to record the RGB images in JPG format on the memory card of the  
 136 camera. Flight altitude above ground varied between 20 to 50m to get a ground sampling distance  
 137 (GSD) between 2 mm and 5 mm per pixel (Table 3). The flight trajectory was designed to ensure more  
 138 than 70% overlap between images across and along tracks. Ground control points were placed in the  
 139 field and their coordinates were measured with a real-time kinetic GPS device ensuring an absolute  
 140 centimetric accuracy of their position.

141 **Table 3: Characteristics of each measurement sessions. For sugar beet, microplots from one**  
 142 **session to another are the same. For sunflower the microplots considered change between**  
 143 **sessions. The typical size of the BB for one session is computed as the square root of the mean**  
 144 **area of all the BBs. The typical bounding box (BB) size in pixels is computed after up sampling**  
 145 **the images at 2.5 mm resolution. The plant stage at the time of the session is quantified as: 1:**  
 146 **early, 2: intermediate, 3: late. The correspondence with BBCH scale is provided as a table in**  
 147 **the supplementary material section. The weed infestation is scored from 0 (no weed), from 0**  
 148 **(no weeds), 1 (less than 5% coverage), 2 (more than 5% coverage). The image blur is quantified**  
 149 **by the average variance of the Laplacian: high blur results in low value of the variance of the**  
 150 **Laplacian.**

|            | Session_name          | plant number | plot number | Stage | GSD (mm) | typical BB size (cm) | typical BB size (pixel) | Weed infestation | Blur |
|------------|-----------------------|--------------|-------------|-------|----------|----------------------|-------------------------|------------------|------|
| MAIZE      | Selommes_2019_1       | 510          | 7           | 1     | 3.5      | 6.5                  | 26                      | 2                | 233  |
|            | Hermine_2019_1        | 542          | 4           | 1     | 3.5      | 7.8                  | 31                      | 1                | 79   |
|            | Thenay_2017_1         | 617          | 6           | 1     | 2.5      | 8.5                  | 34                      | 1                | 1149 |
|            | Castetis_2019_1       | 575          | 5           | 2     | 3.3      | 10.0                 | 40                      | 1                | 121  |
|            | Pleinefougeres_2019_1 | 504          | 2           | 2     | 3.5      | 11.5                 | 46                      | 0                | 39   |
|            | Blois_2019_1          | 579          | 7           | 2     | 3.3      | 12.3                 | 49                      | 1                | 346  |
|            | Menainville_2016_1    | 620          | 6           | 3     | 3.4      | 12.3                 | 49                      | 1                | 78   |
|            | Villedieu_2016_1      | 629          | 6           | 3     | 2.7      | 13.3                 | 53                      | 0                | 261  |
|            | Nerac_2016_1          | 594          | 8           | 3     | 4.0      | 15.0                 | 60                      | 0                | 37   |
|            | <b>Total</b>          | <b>5170</b>  | <b>51</b>   |       |          |                      |                         |                  |      |
| SUGAR BEET | Memmie_2017_1         | 667          | 6           | 1     | 4.5      | 8.0                  | 32                      | 0                | 26   |
|            | Charmont_2018_1       | 556          | 7           | 1     | 4.2      | 11.5                 | 46                      | 0                | 93   |
|            | Memmie_2018_1         | 602          | 6           | 1     | 4.3      | 11.5                 | 46                      | 0                | 77   |
|            | Bucy_2017_1           | 634          | 7           | 2     | 5.3      | 12.8                 | 51                      | 0                | 25   |
|            | Memmie_2017_2         | 679          | 6           | 2     | 5.7      | 14.8                 | 57                      | 0                | 72   |
|            | Etienne_2017_1        | 635          | 6           | 2     | 4.5      | 16.0                 | 64                      | 0                | 27   |
|            | Charmont_2017_1       | 669          | 8           | 3     | 3.4      | 20.5                 | 82                      | 0                | 191  |
|            | Charmont_2018_2       | 647          | 8           | 3     | 4.1      | 20.5                 | 82                      | 0                | 102  |
|            | Bucy_2017_2           | 558          | 6           | 3     | 4.5      | 23.0                 | 92                      | 0                | 31   |
|            | <b>Total</b>          | <b>5647</b>  | <b>60</b>   |       |          |                      |                         |                  |      |
| SUNFLOWER  | Auzeville_2019_1      | 579          | 12          | 1     | 5.0      | 8.5                  | 34                      | 1                | 28   |
|            | Auzeville_2019_2      | 640          | 12          | 1     | 5.0      | 13.5                 | 54                      | 1                | 510  |
|            | Epoisses_2019_1       | 596          | 4           | 1     | 2.5      | 14.3                 | 57                      | 1                | 10   |
|            | Auzeville_2018_1      | 596          | 3           | 2     | 2.3      | 14.3                 | 57                      | 1                | 488  |
|            | Auzeville_2019_3      | 657          | 12          | 2     | 5.0      | 19.3                 | 77                      | 0                | 350  |
|            | Auzeville_2019_4      | 603          | 12          | 2     | 5.0      | 24.5                 | 98                      | 0                | 221  |

|                  |             |           |   |     |      |     |   |      |
|------------------|-------------|-----------|---|-----|------|-----|---|------|
| Rivière_2017_1   | 634         | 8         | 3 | 5.2 | 25.0 | 100 | 2 | 42   |
| Auzeville_2018_2 | 560         | 3         | 3 | 2.6 | 27.5 | 110 | 1 | 1286 |
| Auzeville_2019_5 | 565         | 12        | 3 | 5   | 27.5 | 110 | 2 | 176  |
| <b>Total</b>     | <b>5430</b> | <b>78</b> |   |     |      |     |   |      |

151 Agisoft Photoscan Professional software (Pasumansky, 2016) was used to align the images. The high  
152 overlap between the images and structure from motion algorithm permits to compute the position and  
153 orientation of the cameras. The pipeline described in Jin et al. (Jin et al., 2017) was then run to extract  
154 from each image the portion corresponding to the contained microplots, by extracting microplot thanks  
155 to a georeferenced plot map. Using the original images avoids the possible distortions and artefacts  
156 observed in the orthomosaic. Several extracts may represent the same microplot viewed from different  
157 positions of the UAV (Duan et al., 2016). For each microplot, the sharpest extract that contained the  
158 whole microplot is selected. For each session, a few microplots were selected for labelling (Table 2).  
159 Approximately 600 plants per session were labelled to ensure consistency across sessions which  
160 resulted in a total of 16247 labelled plants. Images were rescaled to match the best available GSD (2.5  
161 mm, Table 3). This was necessary to control the apparent size of object, which can make the Deep  
162 Learning methods fail. Then all images were labelled using the coco-annotator tool (Brooks, 2019), an  
163 open source platform which allow the collaborative drawing of bounding box (BB) around each plant,  
164 which will be used as label. Six different operators contributed to the labelling. The labelling from one  
165 operator was always reviewed at least once by a different operator. The typical size of the BB for one  
166 session (Table 3) was computed as the square root of the mean area of all the BBs.

167 The plant development stage during the acquisition sessions was scored into three relative levels, where  
168 stages 1 ,2 and 3 correspond respectively to early (few days after emergence), intermediate, and late  
169 stages (leaves start to fill the gap between plants). The correspondence between the stages for each  
170 crop, and their BBCH scale is presented in Table S1. The level of weed infestation (Table 3) was also  
171 visually evaluated from 0 (no weeds), 1 (sparse presence of weeds), 2 (infestation). The level of  
172 blurriness for each session (Table 3) was evaluated by calculating the average variance of the discrete  
173 Laplacian (Bansal et al., 2016), which is implemented in python with OpenCV .

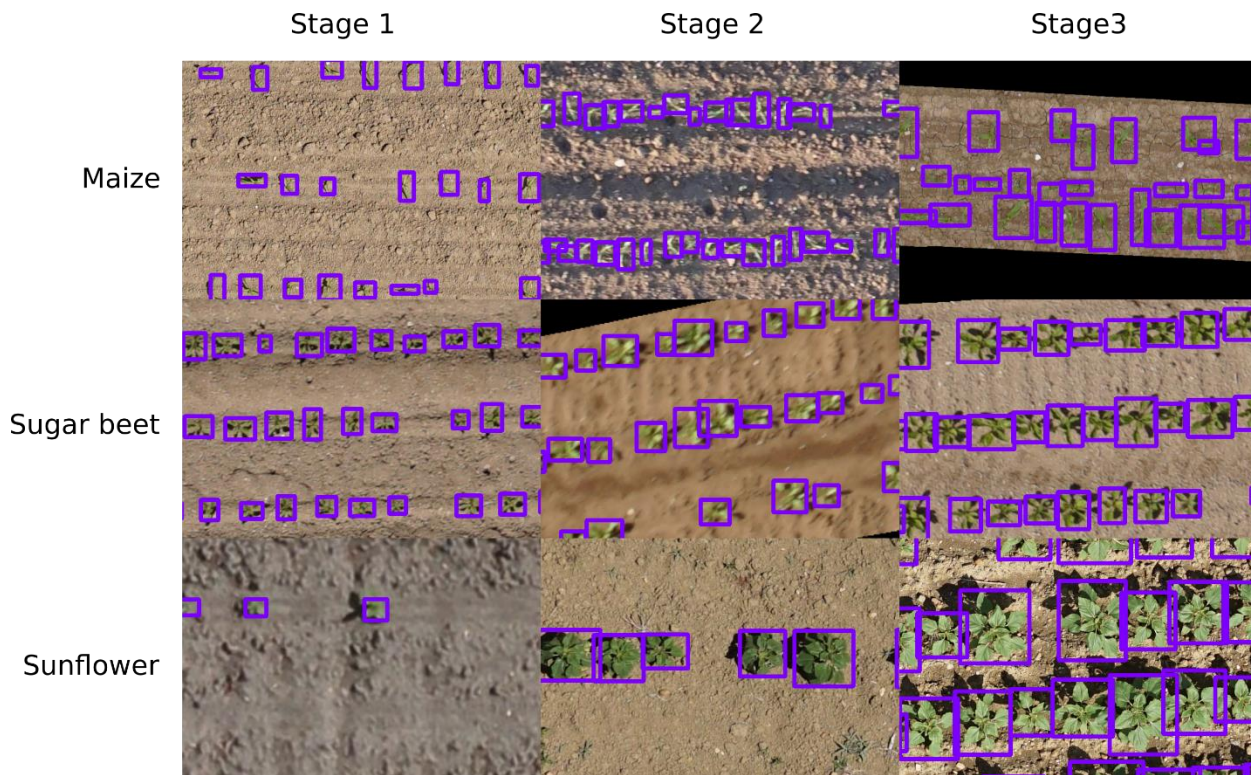

174

175 **Figure 1: Samples of images for the three-development stage. All images were resampled to**  
176 **0.25mm.px<sup>-1</sup>. The bounding boxes were drawn interactively around the plants.**

## 177 2.2 Plant detection methods

### 178 2.2.1 Handcrafted method

179 The method developed here is based on several assumptions: (1) the plants are green and can be  
180 accurately separated from the background; (2) plants are sown in rows relatively evenly spaced and  
181 parallel; (3) the weeds are mainly located in between the rows and are not too dominant; (4) plants are  
182 relatively evenly spaced on the row and are not too variable in shape and size. The method first extracts  
183 each single row and then identifies each individual plant on the row. All the parameters of our HC  
184 method are expressed in relative value to the row or plant spacing, to allow adaptation to a larger  
185 number of sowing patterns. This makes our method scalable to all our experimental conditions across  
186 the three species (Table 2 and table 3). The values of the parameters were set based on reasonable  
187 assumptions and were not calibrated on a dataset.

#### 188 2.2.1.1 Row extraction

189 The original RGB images are first transformed into a black and white one (BW) using the excess green  
190 index (Equation 1). Pixels are then assigned to the green (1) or background (0) classes using the ExG  
191 threshold value defined with the Otsu algorithm for each session (Otsu, 1975). Otsu algorithm is a  
192 method to perform automatic image thresholding based on the maximization of the class inter-variance.  
193 We used the implementation of python OpenCV library.

194 **Equation 1:  $ExG = \frac{2G-B-R}{G}$** . **R, G, B** correspond respectively to the red, green and blue colours  
195 **of the original image (Meyer and Neto, 2008)**

196 The Hough transform (Hough, 1962) is used to identify the main alignments corresponding to the rows  
197 and find their orientation. For each pixel assigned to green (1), several lines are drawn with different  
198 directions and for each line, the number of pixels it crosses is accumulated, allowing to find the  
199 orientation of the longest lines. We used Hough Transform implementation of python OpenCV library.  
200 The image is then rotated to display the rows horizontally (Figure 2). The number of green pixels in  
201 each line is computed to obtain a profile of green pixels across the rows. The peaks of the green pixel  
202 profiles are localized using the prior knowledge on row spacing (*Row\_spacing\_prior*) to prevent  
203 finding unexpected peaks between rows. The prior knowledge of the number of rows per microplot  
204 (*Row\_number\_prior*) is also used when identifying the peaks. The prior values of row and plant spacing  
205 are not always known precisely. Therefore, the row extraction pipeline (Figure 2) provides also updated  
206 and more accurate values of *Row\_spacing\_prior* for each session. Finally, each row is extracted using  
207 the fine-tuned value of the row width.

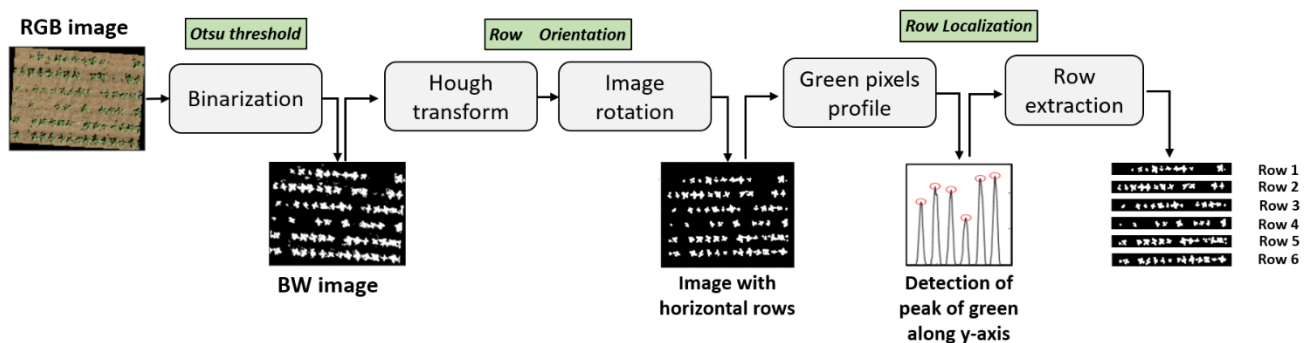

208  
209 **Figure 2 Flowchart of the rows extraction process from the original RGB image.**

### 210 2.2.1.2 Plant identification with an object-based method

211 After the row extraction, the algorithm individualizes the objects (groups of connected pixels) in the  
212 image and classifies them as plants or weeds. Weeds are eliminated based on the distance to the row  
213 center. If the centroid of an object is located at a distance larger than a threshold value  
214 (*Minimum\_distance\_to\_row*), it is considered as a weed. The threshold value is expressed in relative  
215 value to the row spacing and set to 0.25 (Table S2). Objects with dimensions along the row direction  
216 larger than the *Plant\_spacing\_prior* value (Table 2) are expected to include several plants. The number  
217 of plants contained in these big objects is derived from the number of peaks observed when summing  
218 the green pixels along the row direction, where a peak may correspond to a plant position. Further, the  
219 number of plants found by the number of peaks is crosschecked with the expected number of plants  
220 computed by dividing the extension of the object by the *Plant\_spacing\_prior* value. Results are  
221 illustrated in Figure 3 for the two objects on the right of the bottom row.

222 Finally, some objects may be located too close together to be considered as separate plants because  
223 these objects correspond to several parts of the same plant. Figure 3 illustrates it with the second plant  
224 starting from the left on the top row, where a leaf and the main plant are separated. If the distance  
225 between the centroids of the closest object is smaller than the maximum acceptable distance,  
226 *Big\_plants\_tolerance*  $\times$  *Plant\_spacing\_prior*, the two objects are merged as a single plant. Table S2 in  
227 the supplementary materials presents the value used for each parameter. The centroid (center of mass



228 of the object), and the bounding box (smallest rectangle that contains all object's pixels) of the objects  
229 are finally computed.

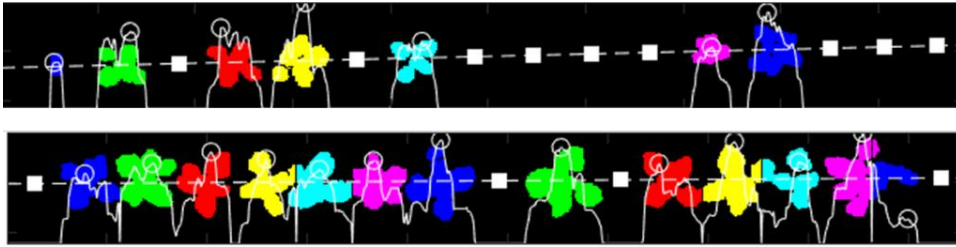

230

231 **Figure 3: Typical output of the HC algorithm illustrated for two sugar beet rows. The dashed**  
232 **white line indicates the row. The white curve represents the profile of number of green pixels**  
233 **perpendicular to the row, with peaks identified by a circle. The object-based method is illustrated**  
234 **by the colors assigned to each identified plant. Note that big objects have been split into**  
235 **individual plants (bottom row, the four last plants) and isolated plant parts have been**  
236 **reconnected to form a single plant (top row, fourth plant starting from the left). The white**  
237 **squares correspond to the position of missing plants**

## 238 2.2.2 Deep-learning method

### 239 2.2.2.1 Model architecture

240 An object detection method was selected to predict the bounding box around each plant. This  
241 information can then be used to derive more traits to characterize every individual plant. Object  
242 detection is a fast-growing area within DL techniques since the emergence of networks such as R-CNN  
243 (Regions with Convolutional Neural Network , (Girshick et al., 2013) ) or SSD (Single Shot Detector,  
244 (W. Liu et al., 2016) ). Most DL object detection models fall into one-stage or two-stage models. In  
245 the one-stage model, the object is localized and categorized in a single step. In the two-stage model, a  
246 first stage detects possible objects, and a second stage categorizes them. The Faster-RCNN two-stage  
247 model (Ren et al., 2015) is used because it performs well in the context of plant phenotyping. Madec  
248 et al. (Madec et al., 2019) used it successfully for counting wheat heads. It allows also to analyze the  
249 nature of the possible errors by visualizing them.

250 Faster-RCNN can be implemented in many forms which can influence the final results. We use the  
251 implementation made by the mmdetection library (Chen et al., 2019) .It contains many detectors, and  
252 is written upon PyTorch (Paszke et al., 2019). The default implementation of the library is used and  
253 contains a Feature Pyramidal Network (FPN) (Lin et al., 2017), which differs from the original paper  
254 (Ren et al., 2015). It is used to provide object proposition at different scales. A ResNet-34 model (He  
255 et al., 2015) was used as the backbone network because it offers a good compromise between accuracy  
256 and speed of training. The backbone extracts the deep features which are used by the Region Proposal  
257 Network (RPN) to detect potential objects which are then classified as crop or background. All other  
258 architectural details are given in the code (<https://github.com/EtienneDavid/plants-counting-detection>)  
259 . We also choose to train one model by crop as preliminary tests show lower performances when mixing  
260 the three crops.

### 261 2.2.2.2 Pre-processing and data augmentation

262 The input image size of the network is set to 512 x 512 pixels to match memory constraints during  
263 training. However, images from the microplots are larger. A preprocessing step first splits them  
264 randomly into patches of 512 x 512 pixels. For each session in the training dataset, 100 patches were

265 randomly selected which results in a total of 900 patches to train the model for each crop over the nine  
266 available sessions. Randomly sampled patches provide more diversity than evenly sampled ones.  
267 During the training process, data augmentation is applied to extend the diversity of images. The  
268 complete data augmentation pipeline is a set of geometric distortions (Random rotation, Random  
269 Translation, Random Shear), blur (Gaussian Blur), noise (Gaussian noise) and colorimetric  
270 augmentation (Random hue value, Random contrast). At each iteration, a set of transformation is  
271 randomly drawn with random parameters so each batch is unique. The range of possible parameters  
272 were chosen so that the resulting image still look realistic. All data augmentation details are given in  
273 the code. Once trained, the model is applied to all the patches. Predictions from the overlapping patches  
274 are finally merged together by using the Non-Max-Suppression algorithm (Ghosal et al., 2019) with  
275 an Intersection over Union (IoU) threshold of 0.70.

### 276 **2.2.3 Hybrid method**

277 DL methods detect individual plants based on many features automatically extracted while HC  
278 methods exploit expert prior knowledge on the sowing pattern to eliminate plants located at a non-  
279 expected position between rows. We propose therefore a hybrid method that combines the benefits of  
280 both HC and DL ones. The DL method is first applied to detect plants. Then, the HC method presented  
281 earlier is used to identify the row position and eliminate all remaining weeds corresponding to plants  
282 with centroids located at a larger distance to the row than a threshold value *distance\_to\_row* (Table  
283 S2).

## 284 **2.3 Evaluation strategy for plant detection**

### 285 **2.3.1 Strategies for training and evaluation**

286 Detection models were developed and evaluated independently for each crop. DL method requires an  
287 extensive training dataset that should represent the expected diversity of situations. Due to the limited  
288 number of labelled images, two strategies are defined: “Out-Domain” and “In-Domain”. “Out-  
289 Domain” is the more rigorous strategy where the performances of the DL method are evaluated over  
290 sessions not used during the training process. For each crop and each stage, two sessions were used for  
291 training and the remaining one for testing. This allows to balance the stages between the training and  
292 testing datasets. A three-fold cross-validation strategy that exploits all sessions while providing  
293 relatively independent test cases is used. Three different models were trained for each crop using six  
294 sessions, representing about 3800 plants, and tested on the remaining three sessions representing  
295 around 1900 plants. The “In-Domain” strategy is based on adding few images randomly selected in the  
296 testing datasets to the training dataset. It aims at reducing possible lack of representativeness in the  
297 training dataset. The same three-fold cross-validation process was used for each crop, except that 1/3  
298 of the 600 plants used previously as testing datasets were added to the training dataset. The remaining  
299 2/3 images (400 plants) are used to evaluate the performances of the models for each crop. The same  
300 test dataset (1200 plants corresponding to the 400 test plants for each of the three test sessions) is finally  
301 used to compare the Out-domain and In-domain approaches. The approach is summarized in Figure 4.

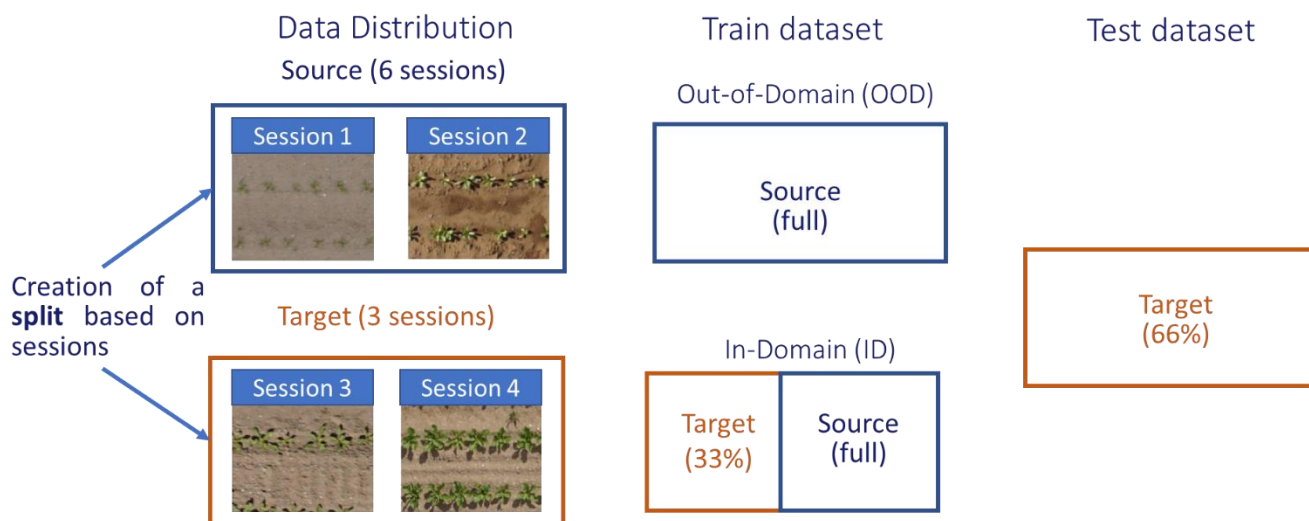

302

303 **Figure 4: Presentation of the strategy for training and evaluation. For each fold, we select 6**  
 304 **sessions as the training distribution and 3 as the target distribution. The test dataset is made of**  
 305 **66% of the target distribution.**

### 306 2.3.2 Evaluation metrics

#### 307 Detection

308 The “Centroid matching strategy” (C\_MS) is used to evaluate whether a plant was correctly detected.  
 309 The C\_MS is based on the distance between the centroids of the plants. If the distance between  
 310 centroids of a detected plant and the closest labelled one is smaller than  $Plant\_distance\_prior / 2$  it is  
 311 considered as true positive (TP). Otherwise, it is a false positive (FP). If a labelled plant has no detected  
 312 plant within a distance smaller than  $Plant\_distance\_prior / 2$ , it is a false negative (FN). TP, FP and  
 313 FN are used to construct the confusion matrix (Equation 2).

314 **Equation 2: Presentation of the confusion matrix. Please note that in detection, there is no True**  
 315 **Negative (TN)**

|                                                    |                   |                          |                             |
|----------------------------------------------------|-------------------|--------------------------|-----------------------------|
| Total population = Number of Ground Truth positive |                   | Prediction               |                             |
|                                                    |                   | Predicted Positive (Box) | Predicted Negative (No box) |
| Ground truth                                       | Positive (Box)    | True Positive (TP)       | False Negative (FN)         |
|                                                    | Negative (No box) | False Positive (FP)      | True Negative (TN)          |

316

317 The plant detection performance was quantified per session with the terms of the confusion matrix  
 318 normalized by the number of labelled plants (TP+FN) for easier comparison between crops and stages,  
 319 which correspond to rates of TP (TPR), FP (FPR) and FN (FNR). The accuracy is also used, defined

320 as TP/(TP+FN+FP). DL method produces a confidence score for each predicted BB. A box is  
 321 considered as a prediction for the DL and HY methods if its score is above 0.5.

### 322 Plant density

323 Plant density (PD) was calculated by dividing the number of plants in the microplot by its area. The  
 324 area is computed as the number of rows multiplied by the row spacing and the row length. The relative  
 325 root mean square error (rRMSE) is used to compare the estimated and the reference PD values and  
 326 assess the accuracy of the method. The accuracy levels were split into four classes to better assess the  
 327 robustness of the method. A rRMSE<5% was considered as good, between 5%<rRMSE<10% as  
 328 satisfactory, between 10%<rRMSE< 20% as poor, and rRMSE>20% as very poor. The percentile of  
 329 microplots belonging to each class was therefore used to evaluate the robustness of the methods.

### 330 Equation 3: Definition of the rRMSE for one session of acquisition

$$331 \quad rRMSE = \frac{\sqrt{\sum_n^1 (Plant\ density_{true,i} - Plant\ density_{predicted,i})^2}}{\sum_n^1 Plant\ density_{true,i}}$$

### 332 Influence of conditions

333 Tests were further conducted to evaluate the impact of the four qualitative factors (crop type,  
 334 development stages, weeds, and soil type) and the impact of the four quantitative factors (sowing  
 335 density, plant size, original resolution, and blurriness). For the qualitative factors, an ANOVA study is  
 336 conducted, and for the quantitative factors a Pearson test is conducted. Both modalities were  
 337 implemented with the python statsmodel library. For both tests, the p-value is calculated to evaluate  
 338 the impact of the agronomical conditions on the final results.

339

## 340 3 Results

### 341 3.1 Detection

342

343 **Table 4: Terms of the confusion matrix for the three methods the three crops, and the three**  
 344 **stages. True Positive Rate (TPR), False Positive Rate (FPR), and False Negative Rate (FNR) are**  
 345 **displayed. N is the true number of plants (N=TP+FN). Green color corresponds to good metrics**  
 346 **values (high for TPR, low for FPR and FNR), and red for poor metrics values (low for TPR, high**  
 347 **for FPR and FNR).**

| Crop          | Stages | N    | TPR  |      |      | FPR  |      |      | FNR  |      |      | Accuracy |      |      |
|---------------|--------|------|------|------|------|------|------|------|------|------|------|----------|------|------|
|               |        |      | HC   | DL   | HY   | HC   | DL   | HY   | HC   | DL   | HY   | HC       | DL   | HY   |
| Maize         | 1      | 1669 | 0.61 | 0.88 | 0.86 | 0.27 | 0.12 | 0.07 | 0.39 | 0.12 | 0.14 | 0.56     | 0.79 | 0.80 |
|               | 2      | 1658 | 0.70 | 0.92 | 0.92 | 0.03 | 0.18 | 0.16 | 0.30 | 0.08 | 0.08 | 0.68     | 0.78 | 0.79 |
|               | 3      | 1930 | 0.70 | 0.88 | 0.86 | 0.05 | 0.15 | 0.14 | 0.30 | 0.12 | 0.14 | 0.68     | 0.77 | 0.77 |
| Sugar<br>beet | 1      | 1825 | 0.95 | 0.98 | 0.98 | 0.04 | 0.01 | 0.01 | 0.05 | 0.02 | 0.02 | 0.93     | 0.97 | 0.97 |
|               | 2      | 1948 | 0.95 | 0.99 | 0.99 | 0.01 | 0.03 | 0.03 | 0.05 | 0.01 | 0.01 | 0.93     | 0.97 | 0.97 |
|               | 3      | 1874 | 0.94 | 0.99 | 0.99 | 0.06 | 0.04 | 0.04 | 0.06 | 0.01 | 0.01 | 0.88     | 0.95 | 0.95 |

|           |   |      |      |      |      |      |      |      |      |      |      |      |      |      |
|-----------|---|------|------|------|------|------|------|------|------|------|------|------|------|------|
| Sunflower | 1 | 1603 | 0.80 | 0.87 | 0.86 | 0.17 | 0.06 | 0.04 | 0.20 | 0.13 | 0.14 | 0.75 | 0.80 | 0.81 |
|           | 2 | 1856 | 0.82 | 0.94 | 0.94 | 0.15 | 0.08 | 0.07 | 0.18 | 0.06 | 0.06 | 0.72 | 0.87 | 0.88 |
|           | 3 | 1759 | 0.86 | 0.97 | 0.97 | 0.42 | 0.43 | 0.21 | 0.14 | 0.03 | 0.03 | 0.61 | 0.74 | 0.81 |

348

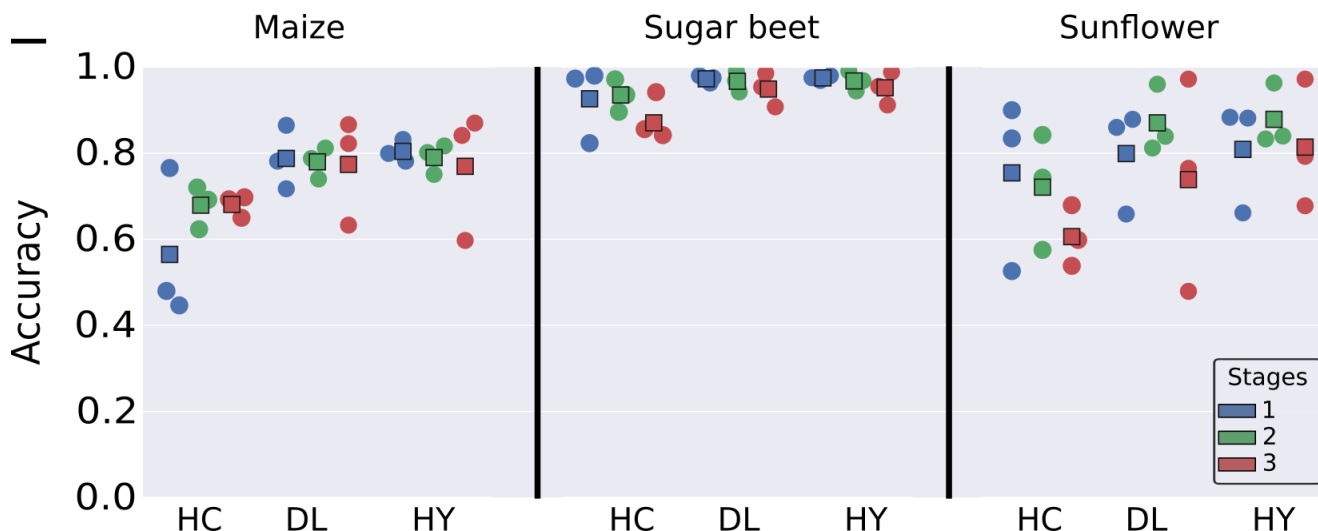

349

350 **Figure 5: Accuracy for all methods and crops. For each crop and method, the stages are**  
 351 **represented by a specific color. Each point corresponds to a test session used in the three-fold**  
 352 **validation process. The squares represent the average of the three points.**

353 Detection performances are very different depending on the crops (Table 4 and Figure 5). Detection of  
 354 maize plants appears difficult for the three methods and particularly for HC with a low TPR and a high  
 355 FNR (Table 4). However, a high FNR is also observed for the first development stage with the HC  
 356 method. A large variability between the three instances of the three-fold cross validation is observed  
 357 for this early stage (Figure 5), probably due to the variability in image quality. Marginal differences  
 358 are observed between DL and HY methods. They both show relatively balanced FPR and FNR. This  
 359 results into accuracy values between 0.77 to 0.80 with little variation between stages (Table 4).  
 360 However, a larger variability across the three instances of the three-fold cross validation is observed  
 361 for the late stage (Figure 5)

362

### 363 3.2 Counting

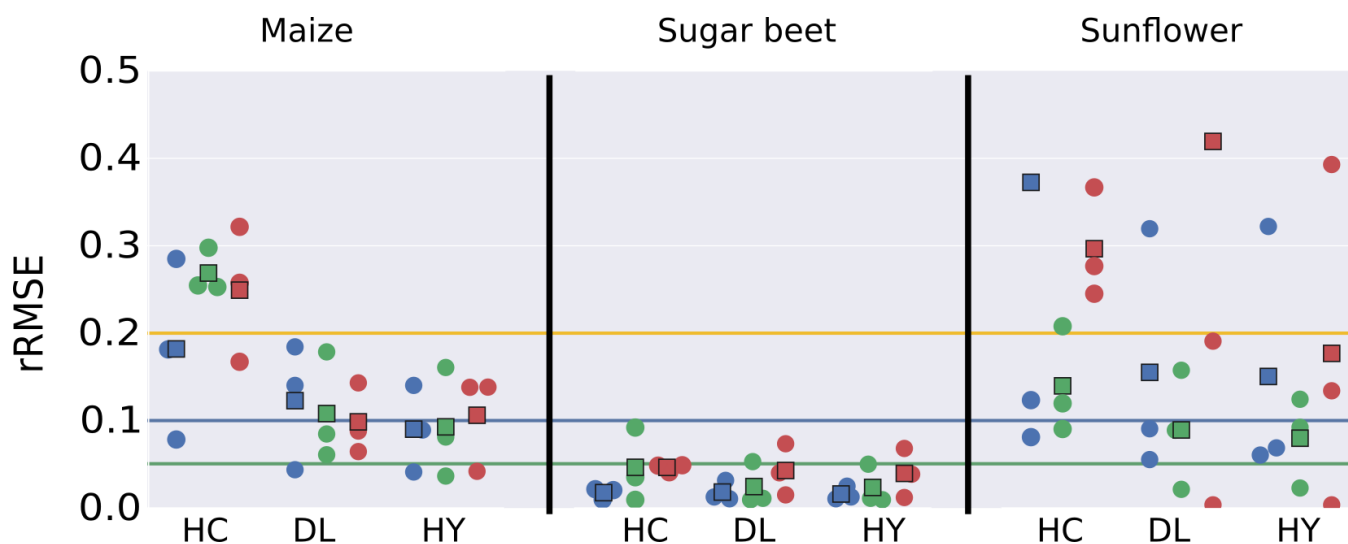

364

365 **Figure 6: rRMSE for plant density estimation for all methods crops, and stages. Results**  
366 **obtained over the testing dataset. For each crop, method and stage, the three instances**  
367 **(corresponding to three testing sessions) of the three-fold cross validation process are displayed**  
368 **as colored dots, while the corresponding average is represented by a colored square. Colors**  
369 **correspond to stages. The rRMSE threshold values to acceptable level of performance (green:**  
370 **very good, blue: good, orange: acceptable)**

371 The HC method provides the poorest performances for maize plant density estimation, with rRMSE  
372 generally higher than 0.2 (Figure 6), which is consistent with the poorer detection performances (Figure  
373 5). Image acquisition during the early stages tends to degrade the performances conversely to what was  
374 observed for the detection (Figure 5). This may be explained by the unbalance between false positives  
375 and negatives observed for the early stages (Table 4). Marginal differences are observed between DL  
376 and HY methods for maize where weeds were not the main issue.

377

### 378 3.3 Out-Domain against In-Domain results

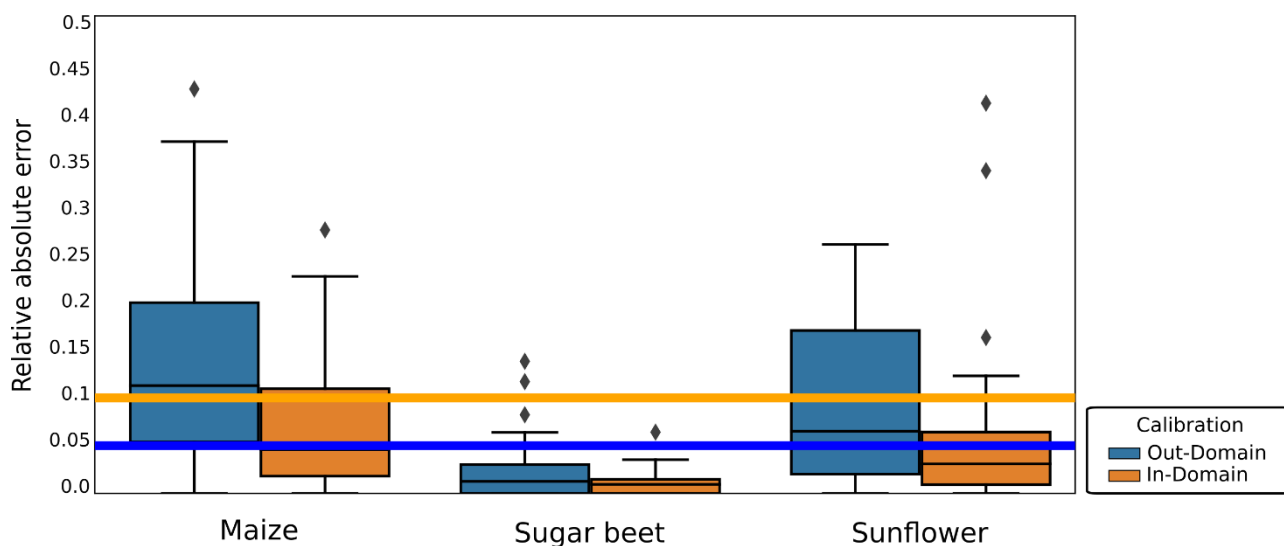

379

380 **Figure 7: Distribution of relative absolute error for each microplots for the Out-Domain and In-**  
381 **Domain approaches for DL. Box-plot representation where the black horizontal bar represents**  
382 **the median, the box represents  $\pm 25\%$ , the whiskers while the whiskers extend to the the lowest**  
383 **(highest) data point still within 1.5 interquartile range of the lower (upper) quartile. Diamonds**  
384 **are outliers. 1 outlier for Out-domain Maize and 3 outliers for Out-Domain Sunflower are above**  
385 **0.5 and are not presented on the graph.**

386 The “Out-domain” strategy used previously was compared here to the “In-domain” one where 1/3 of  
387 the images of the initial testing sessions were used to finetune the model. Performances are evaluated  
388 on the remaining 2/3 images of the initial testing sessions to keep some independence between the  
389 training and test datasets. Results show that the additional images used in the training process and  
390 having similar characteristics as those in the testing dataset decreased significantly the rRMSE for all  
391 crops (Figure 7). Training with the In-domain strategy reduces the variability of performances across  
392 sessions. The 5% rRMSE value is reached for all crops except maize, where performances are anyway  
393 close to this target. Plant overlapping and the small leaf size makes the DL method for maize more  
394 challenging. However, there are still some outliers for Maize and Sunflower, corresponding to  
395 Pleinefougeres\_2019\_1 and Epoisses\_2019\_1 sessions. The images of these two sessions are highly  
396 blurred (Table 3) explaining most of their poor detection performances. A large part of this  
397 performance can be attributed to the elimination of almost all weeds by the DL methods, without the  
398 need of the HY correction, which have learned the pattern of the weeds, instead of relying on the  
399 location, and a better recognition of the plants.

400

## 401 4 Discussion

### 402 4.1 DL and HY methods detect better plants than the HC one

403 Several factor can explain the variability of the results: the small size of the plants that overlap,  
404 resulting into groups of overlapping plants that are interpreted as a single plant (Figure 5b), or to poor  
405 threshold values determined by the Otsu method for the green segmentation used in the first step to  
406 identity objects (Figure 5a) , due to the poor quality of the green segmentation where background  
407 artifacts such as small rocks or crop residues were interpreted as plants (Figure 5g). Also, in some case  
408 a high FPR is mostly explained by possible confusion between plants and their shadows or soil artifacts

409 (Figure 5c) while FNR is explained by the small size of the plants that are difficult to detect (Figure  
410 5d).

411 Detection of sugar beet plants appears to be much easier, with performances similar between the three  
412 methods. The sugar beet crops better verify the assumptions described in 3.2.1. The plots were not  
413 infested by weeds (Table 4), which seems to be an important explanation for the success of all methods.  
414 A small FPR is observed for the three methods, particularly for the latest stage, which explains the  
415 decrease in accuracy (Table 4). This is due to difficulties when plants are overlapping (Figure 5e).  
416 Slightly higher FNR is observed for HC corresponding to non-detected plants in the case of small  
417 plants and image of poor quality. This is also observed with DL for the very early stages (Figure 5f).  
418 The variability across the three instances of the three-fold cross validation is also small (Figure 4).  
419 Marginal differences are observed between DL and HY methods mostly because of the good control  
420 of weeds.

421 Detection of sunflower plants shows accuracy values intermediate between maize and sugar beet  
422 (Table 4 and Figure 4). The HC shows lower TPR and higher FPR and FNR as compared to DL and  
423 HY. In the late stage, the HC shows very high FPR corresponding to problems of plant separation when  
424 they are overlapping. Further, the weeds close to the row line are not well eliminated and confounded  
425 with plants (Figure 5g). Similar problems are observed for the DL method, with weeds confounded  
426 with the crop. However, the HY methods allows to eliminate part of the weeds that are located in  
427 between rows (Figure 5h). and HY shows high and similar TPR (Table 4). However, a high FPR is  
428 also observed for the first stage with the HC method, due to the poor quality of the green segmentation  
429 where background artifacts, such as small rocks or crop residues, were interpreted as plants (Figure  
430 4g). Conversely, high FPR are observed for the late stage where DL shows difficulty to detect plants  
431 in a group of overlapping ones and confounds weeds with the crop. A large variability between the  
432 three instances of the three-fold cross validation is observed for sunflower (Figure 4). It is explained  
433 by a high degree of heterogeneity in the microplots and between them, as well as between sessions.



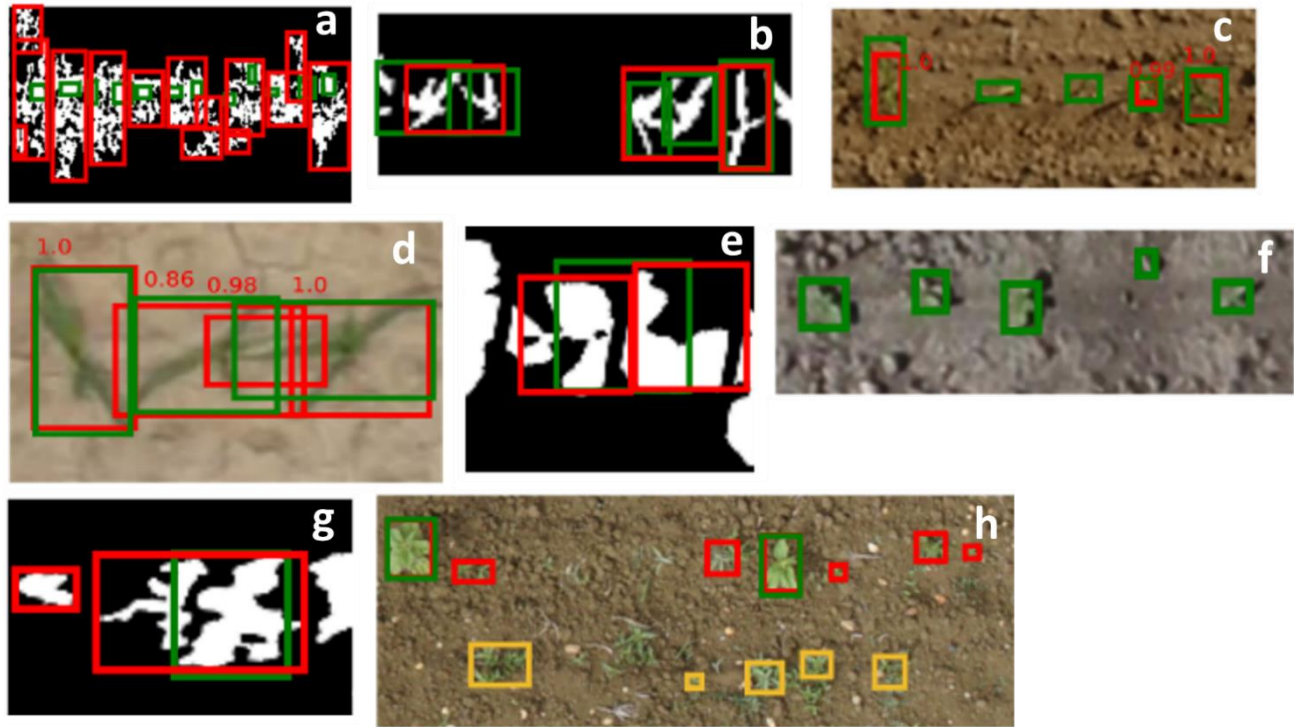

434

435 **Figure 8: Possible detection errors for HC and DL methods. The green BBs correspond to the**  
 436 **labelled plants. The red BBs correspond to the detected plants and yellow boxes correspond to**  
 437 **weeds detected as crop. RGB images are displayed for the DL method. BW images are displayed**  
 438 **for the HC method. a, b, c, d corresponds to maize, e, f, to sugar beet and g, h to sunflower.**

439 Image quality appears therefore mandatory for HC methods to get a good segmentation. The HC  
 440 methods appears also limited to eliminate weeds on the rows and to separate efficiently the overlapping  
 441 plants. DL methods are similarly limited in separating crops from weeds, with confusions made mostly  
 442 on unseen type of weeds (Figure 5h). However, the HY methods allows to eliminate part of the weeds.  
 443 The DL methods also show some difficulties in detecting plants when they are small or when their  
 444 shadows or other soil artifacts such as cracks are present. Nevertheless, our DL methods seems to  
 445 outperform the HC ones in most cases.

446

447 Tests were further conducted to evaluate the impact of the four qualitative factors (crop type,  
 448 development stages, weeds, and soil type) using the p-value computed from a variance analysis. Results  
 449 show (Table 5) that crop-type is an important factor (p\_value smaller than 0.05) for HC and HY, while  
 450 weeds are important for HC and DL, and soil-type for HC. However, the low number of examples (27  
 451 sessions in total), and the non-evenly distribution of the several factors (for instance most examples of  
 452 high levels of weed infestation are found in sunflower sessions only) prevents from drawing final  
 453 conclusions. The impact of the four quantitative factors (sowing density, plant size, original resolution,  
 454 and blurriness) were also evaluated using a Pearson test. It reveals (Table 5) that no factors appear  
 455 significant (p-value smaller than 0.05), while the lowest p-values are observed for the sowing density  
 456 and plant size that are closely related to the crop type.

457 **Table 5: p-values computed from an ANOVA for the qualitative factors and Pearson test for the**  
 458 **quantitative factors.**

459

| Factors | Type | HC | DL | HY |
|---------|------|----|----|----|
|---------|------|----|----|----|

|                     |              |            |            |            |
|---------------------|--------------|------------|------------|------------|
| Crop type           | qualitative  | 0.009130** | 0.127550   | 0.032050** |
| Development stage   | qualitative  | 0.857810   | 0.479530   | 0.643620   |
| Weed infestation    | qualitative  | 0.032610** | 0.001600** | 0.074540   |
| Soil type           | qualitative  | 0.026430** | 0.781090   | 0.830650   |
| Sowing density      | quantitative | 0.067379   | 0.076542   | 0.091679   |
| Original resolution | quantitative | 0.905626   | 0.572383   | 0.616534   |
| Plant size          | quantitative | 0.791437   | 0.064765   | 0.211019   |
| Blurriness          | quantitative | 0.111743   | 0.562775   | 0.501980   |

460

## 461 **4.2 Plant density is better estimated with DL and HY methods**

462 All the methods reach good performances ( $rRMSE < 0.05$ ) for sugar beet, with even better performances  
463 for the two first stages when plants are easily identified and weeds not too developed (Figure 6). The  
464 poorer detection performances noticed earlier for HC (Figure 4) do not impact the density estimation  
465 because the FPR is well compensated by the FNR.

466 Sunflower shows more variability between sessions and stages, with  $rRMSE$  around 0.1 for the  
467 intermediate development stage showing better performances than the early one and moreover than the  
468 late one (Figure 6). The models for sunflower are very poor for the session 3\_auzeville\_2019\_5 (Figure  
469 6), mainly because of weed infestation. DL performs better than HC while HY improves marginally  
470 the performances for the two early stages, but significantly for the late stage where significant weed  
471 infestation was observed.

472 Overall, our results show lower performances than those of the studies where the training and testing  
473 datasets were not independent. For maize detection accuracy between 0.93 and 0.96, and relative  
474 counting error around 1.5%, were reported (Quan et al., 2019; Varela et al., 2018) while none of our  
475 methods achieve such performances. Similar range of results are obtained on rapeseed (counting error  
476 of 6.83%) (Zhao et al., 2018), or safflower with  $rRMSE$  approximately under 5% (Koh et al., 2019).  
477 However, our results with DL and HY are comparable to studies keeping the training and test datasets  
478 independent; on maize Gnädinger and Schmidhalter (Gnädinger and Schmidhalter, 2017) reports a  
479 counting error of +/- 15%. The HC approach applied when its main assumptions are verified performs  
480 well and comparably to DL.

## 481 **4.3 Adding few images from the test domain improves drastically the DL performances**

482 The performances of DL methods are closely related to the number of images used in the training  
483 dataset and their representativity of the possible situations (Geirhos et al., 2020). DL method works  
484 very well for sugarbeet where all the images were relatively similar across sessions for each  
485 development stage. However, the acquisition conditions were quite different from the ones experienced  
486 in the other sessions for the sunflower on Epoisses\_2019\_1, explaining why the DL models had more  
487 difficulties to detect plants for this session. Note first that the plant density estimation performances  
488 (Figure 7) evaluated on a limited test data set (1200 images) are very consistent with the ones presented  
489 previously over the full test dataset including 1800 images (Figure 6). Overall, the addition of in-  
490 domain data largely outperforms the marginal gain observed with the HY method on few sessions.

491 Our results demonstrate that active learning techniques (Ghosal et al., 2019) could greatly improve DL  
492 model performances for these new sessions. A small sample of images coming from the new sessions  
493 to be processed have to be labelled to complement the training dataset, but more than quantity, it is  
494 uniquely due to the diversity: only 40m<sup>2</sup> of maize or sugarbeet, and between 50 and 100m<sup>2</sup> of sunflower

495 have been added to the training dataset, leading to a dramatic increase of the performances which  
496 cannot be attributed only to the dataset size increase. These results demonstrate the importance of  
497 having a proper design of DL training dataset when proposing a new trait to get robust estimates as  
498 required by agronomists, breeders, and farmers.

499  
500 Our results are consistent with those of previous studies: detection and density estimation performances  
501 are generally lower when the training and the test datasets are independent, i.e not coming from the  
502 same measurement sessions. Fernandez-Gallo (Fernandez-Gallego et al., 2020) report a rRMSE below  
503 5%, Madec et al. (Madec et al., 2019) report a rRMSE of 15% on an independent test set. Similar drop  
504 in performances seems to happen in maize when comparing the results of Varela et al. (counting error  
505 of 1.5%) to those of Gnädinger and Schmidhalter (counting error of +/- 15%). The generalization  
506 potential of DL methods is high, requiring including more diverse situations in the training dataset at  
507 the expense of the tedious and expensive interactive labelling process. However, alternative techniques  
508 could be used to bypass this limitation, including data sharing between several organizations as this  
509 was done for the head counting problem (David et al., 2020). Data augmentation (Kuznichov et al.,  
510 2019) could also improve greatly the generalization performances of DL methods. It would consist in  
511 manipulating the quality of the images, while creating synthetic images where a wide diversity of plants  
512 and weeds would be placed over different backgrounds with variation in the development stages and  
513 sowing pattern.

## 514 **5 Conclusion**

515 This study was based on a comprehensive dataset covering three main crops, several growth stages and  
516 acquisition conditions. It will be open to the community on Zenodo  
517 (<https://zenodo.org/record/4890370>) to be possibly used as a benchmark for plant counting and  
518 detection from RGB images acquired from UAVs. Our results show that when the main assumptions  
519 on the sowing patterns are verified, simple HC methods can reach good enough performances to be  
520 used for applications as it was observed here for sugar beet. However, simple Deep Learning methods  
521 generally outperform the simple HC ones. Nevertheless, due to the large heterogeneity in terms of  
522 background, plant shape and phenological stages encountered across the wide collection of images  
523 considered, we demonstrated that the performances of the DL methods largely depend on the training  
524 and test datasets used. When the training domains used for the DL method are fully independent from  
525 the testing ones, the overall performances are reduced due to the failure of the model in a number of  
526 test cases poorly represented in the training dataset. Conversely, when adding few examples of images  
527 representative of the test domain, the performances increase drastically to reach those reported in most  
528 studies where training and test domains are not differentiated. Important gain in robustness could  
529 therefore be reached by including in the training dataset few images coming from the inference  
530 domains. Alternatively, a better understanding of the factors of variability between domains could  
531 constitute the basis to generate efficient data augmentation techniques that may even include synthetic  
532 images. An extended version of the dataset is needed to conclude on the main factors of error on plant  
533 counting with UAV. The hybrid method proposed to better eliminate weeds could be replaced  
534 efficiently by including images of the canopy where weeds were artificially incrustated.

## 535 **6 Acknowledgments**

536 The work received support from ANRT for the CIFRE grant of Etienne David, co-funded by Arvalis.  
537 The study was partly supported by several projects, including ANR PHENOME. Many thanks to the  
538 dataset contributors:

539 - Arvalis (maize) : Menainville, Nerac, Villedieu, Thenay, Castetis

- 540 - Hiphen Plant (maize) : Blois, Selommes, Ermine, Pleinefougère
- 541 - Institut Technique de la Betterave (ITB) : All sugarbeet datasets
- 542 - Terres Inovia (sunflower) : Epoisses
- 543 - INRAe (sunflower): Auzeville, Rivière

544

## 545 **7 References**

546

547 Bansal, R., Raj, G., Choudhury, T., 2016. Blur image detection using Laplacian operator and Open-  
548 CV, in: 2016 International Conference System Modeling Advancement in Research Trends  
549 (SMART). pp. 63–67. <https://doi.org/10.1109/SYSMART.2016.7894491>

550 Brooks, J., 2019. COCO Annotator.

551 Calvario, G., Alarcón, T.E., Dalmau, O., Sierra, B., Hernandez, C., 2020. An Agave Counting  
552 Methodology Based on Mathematical Morphology and Images Acquired through Unmanned  
553 Aerial Vehicles. *Sensors* 20. <https://doi.org/10.3390/s20216247>

554 Chen, K., Wang, Jiaqi, Pang, J., Cao, Y., Xiong, Y., Li, X., Sun, S., Feng, W., Liu, Z., Xu, J., Zhang,  
555 Z., Cheng, D., Zhu, C., Cheng, T., Zhao, Q., Li, B., Lu, X., Zhu, R., Wu, Y., Dai, J., Wang,  
556 Jingdong, Shi, J., Ouyang, W., Loy, C.C., Lin, D., 2019. MMDetection: Open MMLab  
557 Detection Toolbox and Benchmark. arXiv preprint arXiv:1906.07155.

558 Deng, J., Dong, W., Socher, R., Li, L.-J., Li, K., Fei-Fei, L., 2009. Imagenet: A large-scale  
559 hierarchical image database, in: 2009 IEEE Conference on Computer Vision and Pattern  
560 Recognition. Ieee, pp. 248–255.

561 Duan, T., Zheng, B., Guo, W., Ninomiya, S., Guo, Y., Chapman, S.C., Duan, T., Zheng, B., Guo, W.,  
562 Ninomiya, S., Guo, Y., Chapman, S.C., 2016. Comparison of ground cover estimates from  
563 experiment plots in cotton, sorghum and sugarcane based on images and ortho-mosaics  
564 captured by UAV. *Functional Plant Biol.* 44, 169–183. <https://doi.org/10.1071/FP16123>

565 Fernandez-Gallego, J.A., Lootens, P., Borra-Serrano, I., Derycke, V., Haesaert, G., Roldán-Ruiz, I.,  
566 Arous, J.L., Kefauver, S.C., 2020. Automatic wheat ear counting using machine learning  
567 based on RGB UAV imagery. *The Plant Journal* 103, 1603–1613.  
568 <https://doi.org/10.1111/tpj.14799>

569 Geirhos, R., Jacobsen, J.-H., Michaelis, C., Zemel, R., Brendel, W., Bethge, M., Wichmann, F.A.,  
570 2020. Shortcut Learning in Deep Neural Networks. arXiv preprint arXiv:2004.07780.

571 Ghosal, S., Zheng, B., Chapman, S.C., Potgieter, A.B., Jordan, D.R., Wang, X., Singh, A.K., Singh,  
572 A., Hirafuji, M., Ninomiya, S., others, 2019. A weakly supervised deep learning framework  
573 for sorghum head detection and counting. *Plant Phenomics* 2019, 1525874.

574 Girshick, R.B., Donahue, J., Darrell, T., Malik, J., 2013. Rich feature hierarchies for accurate object  
575 detection and semantic segmentation. CoRR abs/1311.2524.

576 Gnädinger, F., Schmidhalter, U., 2017. Digital Counts of Maize Plants by Unmanned Aerial Vehicles  
577 (UAVs). *Remote Sensing* 9, 544. <https://doi.org/10.3390/rs9060544>

578 Godwin, R.J., Miller, P.C.H., 2003. A Review of the Technologies for Mapping Within-field  
579 Variability. *Biosystems Engineering, Precision Agriculture - Managing Soil and Crop*  
580 *Variability for Cereals* 84, 393–407. [https://doi.org/10.1016/S1537-5110\(02\)00283-0](https://doi.org/10.1016/S1537-5110(02)00283-0)

- 581 Guo, W., Zheng, B., Potgieter, A.B., Diot, J., Watanabe, K., Noshita, K., Jordan, D.R., Wang, X.,  
582 Watson, J., Ninomiya, S., Chapman, S.C., 2018. Aerial Imagery Analysis – Quantifying  
583 Appearance and Number of Sorghum Heads for Applications in Breeding and Agronomy.  
584 *Frontiers in Plant Science* 9, 1544. <https://doi.org/10.3389/fpls.2018.01544>
- 585 He, K., Zhang, X., Ren, S., Sun, J., 2015. Deep Residual Learning for Image Recognition.  
586 Hough, P.V., 1962. Method and means for recognizing complex patterns. Google Patents.
- 587 Jacopin, E., Berda, N., Courteille, L., Grison, W., Mathieu, L., Cornuéjols, A., Martin, C., 2021.  
588 Using Agents and Unsupervised Learning for Counting Objects in Images with Spatial  
589 Organization, in: *Proceedings of the 13th International Conference on Agents and Artificial*  
590 *Intelligence - Volume 2: ICAART*,. SciTePress, pp. 688–697.  
591 <https://doi.org/10.5220/0010228706880697>
- 592 Jin, X., Liu, S., Baret, F., Hemerlé, M., Comar, A., 2017. Estimates of plant density of wheat crops at  
593 emergence from very low altitude UAV imagery. *Remote Sensing of Environment* 198, 105–  
594 114. <https://doi.org/10.1016/j.rse.2017.06.007>
- 595 Josue Nahun Leiva, James Robbins, Dharmendra Saraswat, Ying She, Reza J. Ehsani, 2017.  
596 Evaluating remotely sensed plant count accuracy with differing unmanned aircraft system  
597 altitudes, physical canopy separations, and ground covers. *Journal of Applied Remote*  
598 *Sensing* 11, 1–15. <https://doi.org/10.1117/1.JRS.11.036003>
- 599 Koh, J.C.O., Hayden, M., Daetwyler, H., Kant, S., 2019. Estimation of crop plant density at early  
600 mixed growth stages using UAV imagery. *Plant Methods* 15, 64.  
601 <https://doi.org/10.1186/s13007-019-0449-1>
- 602 Kuznichov, D., Zvirin, A., Honen, Y., Kimmel, R., 2019. Data Augmentation for Leaf Segmentation  
603 and Counting Tasks in Rosette Plants, in: *2019 IEEE/CVF Conference on Computer Vision*  
604 *and Pattern Recognition Workshops (CVPRW)*. Presented at the 2019 IEEE/CVF Conference  
605 on Computer Vision and Pattern Recognition Workshops (CVPRW), IEEE, Long Beach, CA,  
606 USA, pp. 2580–2589. <https://doi.org/10.1109/CVPRW.2019.00314>
- 607 Lin, T.-Y., Dollár, P., Girshick, R., He, K., Hariharan, B., Belongie, S., 2017. Feature Pyramid  
608 Networks for Object Detection.
- 609 Lin, T.-Y., Maire, M., Belongie, S., Hays, J., Perona, P., Ramanan, D., Dollár, P., Zitnick, C.L.,  
610 2014. Microsoft coco: Common objects in context, in: *European Conference on Computer*  
611 *Vision*. Springer, pp. 740–755.
- 612 Lin, W., Hasenstab, K., Moura Cunha, G., Schwartzman, A., 2020. Comparison of handcrafted  
613 features and convolutional neural networks for liver MR image adequacy assessment.  
614 *Scientific Reports* 10, 20336. <https://doi.org/10.1038/s41598-020-77264-y>
- 615 Lin, Z., Guo, W., 2020. Sorghum Panicle Detection and Counting Using Unmanned Aerial System  
616 Images and Deep Learning. *Frontiers in Plant Science* 11, 1346.  
617 <https://doi.org/10.3389/fpls.2020.534853>
- 618 Liu, T., Wu, W., Chen, W., Sun, C., Zhu, X., Guo, W., 2016. Automated image-processing for  
619 counting seedlings in a wheat field. *Precision Agriculture* 17, 392–406.  
620 <https://doi.org/10.1007/s11119-015-9425-6>
- 621 Liu, W., Anguelov, D., Erhan, D., Szegedy, C., Reed, S., Fu, C.-Y., Berg, A.C., 2016. Ssd: Single  
622 shot multibox detector, in: *European Conference on Computer Vision*. Springer, pp. 21–37.

- 623 Liu, Y., Cen, C., Che, Y., Ke, R., Ma, Yan, Ma, Yuntao, 2020. Detection of Maize Tassels from  
624 UAV RGB Imagery with Faster R-CNN. *Remote Sensing* 12.  
625 <https://doi.org/10.3390/rs12020338>
- 626 Madec, S., Jin, X., Lu, H., De Solan, B., Liu, S., Duyme, F., Heritier, E., Baret, F., 2019. Ear density  
627 estimation from high resolution RGB imagery using deep learning technique. *Agricultural*  
628 *and Forest Meteorology* 264, 225–234. <https://doi.org/10.1016/j.agrformet.2018.10.013>
- 629 Meyer, G.E., Neto, J.C., 2008. Verification of color vegetation indices for automated crop imaging  
630 applications. *Computers and Electronics in Agriculture* 63, 282–293.  
631 <https://doi.org/10.1016/j.compag.2008.03.009>
- 632 Otsu, N., 1975. A threshold selection method from gray-level histograms [J]. *Automatica* 11, 23–27.
- 633 Pasumansky, A., 2016. AgiSoft PhotoScan Professional.
- 634 Paszke, A., Gross, S., Massa, F., Lerer, A., Bradbury, J., Chanan, G., Killeen, T., Lin, Z.,  
635 Gimelshein, N., Antiga, L., Desmaison, A., Kopf, A., Yang, E., DeVito, Z., Raison, M.,  
636 Tejani, A., Chilamkurthy, S., Steiner, B., Fang, L., Bai, J., Chintala, S., 2019. PyTorch: An  
637 Imperative Style, High-Performance Deep Learning Library, in: Wallach, H., Larochelle, H.,  
638 Beygelzimer, A., Alché-Buc, F., d'áurea, F., Fox, E., Garnett, R. (Eds.), *Advances in*  
639 *Neural Information Processing Systems* 32. Curran Associates, Inc., pp. 8024–8035.
- 640 Quan, L., Feng, H., Lv, Y., Wang, Q., Zhang, C., Liu, J., Yuan, Z., 2019. Maize seedling detection  
641 under different growth stages and complex field environments based on an improved Faster  
642 R-CNN. *Biosystems Engineering* 184, 1–23.  
643 <https://doi.org/10.1016/j.biosystemseng.2019.05.002>
- 644 Ren, S., He, K., Girshick, R., Sun, J., 2015. Faster r-cnn: Towards real-time object detection with  
645 region proposal networks, in: *Advances in Neural Information Processing Systems*. pp. 91–  
646 99.
- 647 Ribera, J., Chen, Y., Boomsma, C., Delp, E.J., 2017. Counting plants using deep learning, in: 2017  
648 IEEE Global Conference on Signal and Information Processing (GlobalSIP). Presented at the  
649 2017 IEEE Global Conference on Signal and Information Processing (GlobalSIP), pp. 1344–  
650 1348. <https://doi.org/10.1109/GlobalSIP.2017.8309180>
- 651 Shrestha, R., Matteis, L., Skofic, M., Portugal, A., McLaren, G., Hyman, G., Arnaud, E., 2012.  
652 Bridging the phenotypic and genetic data useful for integrated breeding through a data  
653 annotation using the Crop Ontology developed by the crop communities of practice. *Frontiers*  
654 *in Physiology* 3, 326. <https://doi.org/10.3389/fphys.2012.00326>
- 655 Torres-Sánchez, J., López-Granados, F., Peña, J.M., 2015. An automatic object-based method for  
656 optimal thresholding in UAV images: Application for vegetation detection in herbaceous  
657 crops. *Computers and Electronics in Agriculture* 114, 43–52.  
658 <https://doi.org/10.1016/j.compag.2015.03.019>
- 659 Valente, J., Sari, B., Kooistra, L., Kramer, H., Múcher, S., 2020. Automated crop plant counting from  
660 very high-resolution aerial imagery. *Precision Agriculture* 21, 1366–1384.  
661 <https://doi.org/10.1007/s11119-020-09725-3>
- 662 Varela, S., Dhodda, P.R., Hsu, W.H., Prasad, P.V.V., Assefa, Y., Peralta, N.R., Griffin, T., Sharda,  
663 A., Ferguson, A., Ciampitti, I.A., 2018. Early-Season Stand Count Determination in Corn via  
664 Integration of Imagery from Unmanned Aerial Systems (UAS) and Supervised Learning  
665 Techniques. *Remote Sensing* 10. <https://doi.org/10.3390/rs10020343>

666 Xiong, H., Cao, Z., Lu, H., Madec, S., Liu, L., Shen, C., 2019. TasselNetv2: in-field counting of  
 667 wheat spikes with context-augmented local regression networks. *Plant Methods* 15, 150.  
 668 <https://doi.org/10.1186/s13007-019-0537-2>

669 Zhao, B., Zhang, J., Yang, C., Zhou, G., Ding, Y., Shi, Y., Zhang, D., Xie, J., Liao, Q., 2018.  
 670 Rapeseed Seedling Stand Counting and Seeding Performance Evaluation at Two Early  
 671 Growth Stages Based on Unmanned Aerial Vehicle Imagery. *Frontiers in Plant Science* 9,  
 672 1362. <https://doi.org/10.3389/fpls.2018.01362>

673

674 **8 Supplementary material (to put in an external file for submission)**

675

| Crop         | Maize | Sugarbeet | Sunflower                     |
|--------------|-------|-----------|-------------------------------|
| Early (1)    | 12    | 14-15     | 14-16 or germination not over |
| Intermediate | 13    | 16        | 17-18                         |
| Late         | 14-15 | 17-19     | 19                            |

676

677 **Table S1. Correspondance between the “Early”, “Intermediate” and “Late stage” and the**  
 678 **BBCH scale for each crop**

679

| Rules              | Parameter name                | Operations    | Definition                                                                                        | values                        |
|--------------------|-------------------------------|---------------|---------------------------------------------------------------------------------------------------|-------------------------------|
| <i>Get BW mask</i> | <i>Excess Green threshold</i> | Segmentation  | The threshold used to transform the image into a vegetation mask                                  | Determined by the otsu method |
| <i>Find row</i>    | <i>Row number spacing</i>     | Row detection | Expected number of rows                                                                           | Determined in Table 1         |
|                    | <i>Row spacing prior</i>      | Row detection | Prior value of the row spacing as defined in Table 1                                              | Determined in Table 1         |
|                    | <i>Peak prior</i>             | Row detection | The fraction of the maximum height of the peaks used to consider a peak as corresponding to a row | 0.5                           |
|                    | <i>Plant spacing prior</i>    | Split object  | Prior value of the plant spacing as defined in Table 1                                            | Determined in Table 1         |

|                               |                                |                  |                                                                                                                           |      |
|-------------------------------|--------------------------------|------------------|---------------------------------------------------------------------------------------------------------------------------|------|
| <b>Find plant</b>             | <i>Minimum distance to row</i> | Weed elimination | Minimum distance from the row centre (expressed relatively to <i>Row spacing prior</i> ) to consider the objects as weeds | 0.25 |
| <b>Remove false positives</b> | <i>Big Plants Tolerance</i>    | Leaves detection | All centroids under <i>Big Plants Tolerance x Plant spacing prior</i> are considered to belong to the same plant          | 0.9  |

680 **Table S2. List of parameters used for row extraction and plant identification**

681 Figure S3: Justification of a centroid matching strategy Centroid matching strategy (C\_MS) is preferred  
682 to the IoU one (IoU\_MS)

683 The C\_MS was initially compared with an intersection over union matching strategy (IoU\_MS), which  
684 is more common. The IoU\_MS is based on the Intersection over Union between the detected and labelled  
685 BB with a standard threshold of 0.5. A detected plant is considered true positive (TP) if its IoU is larger  
686 than 0.5. Otherwise, it is a false positive (FP). If a labeled BB has no overlap with any detected BB, it  
687 is classified as false negative (FN).

688 The size of BB of plants detected by the HC method have different dimensions as compared to the  
689 labelled BB (Figure 4, left): The distribution of the size of BB for HC is gaussian, while that of labelled,  
690 DL and HY are very similar and skewed with significantly smaller BBs as well as larger ones. That  
691 means that the HC is missing small object with the IoU\_MS. This resulted into lower values of accuracy  
692 computed with IoU\_MS (Figure 4, right) because of a significant amount of mismatch between the  
693 predicted and reference BBs at IoU=0.5. Rather than adapting the IoU threshold level, the distance  
694 between centroids is preferred to evaluate the match between predicted and interactively labeled plants.  
695 The accuracy computed with C\_MS (Figure 4, right) is significantly larger than that computed with  
696 IoU\_MS, particularly for the low accuracy values as well as for the HC method for the reasons exposed  
697 above. Therefore, in the following, the centroid distance is used to compute the terms of the confusion  
698 matrix and the accuracy. Detailed metrics can be found in Table S2.

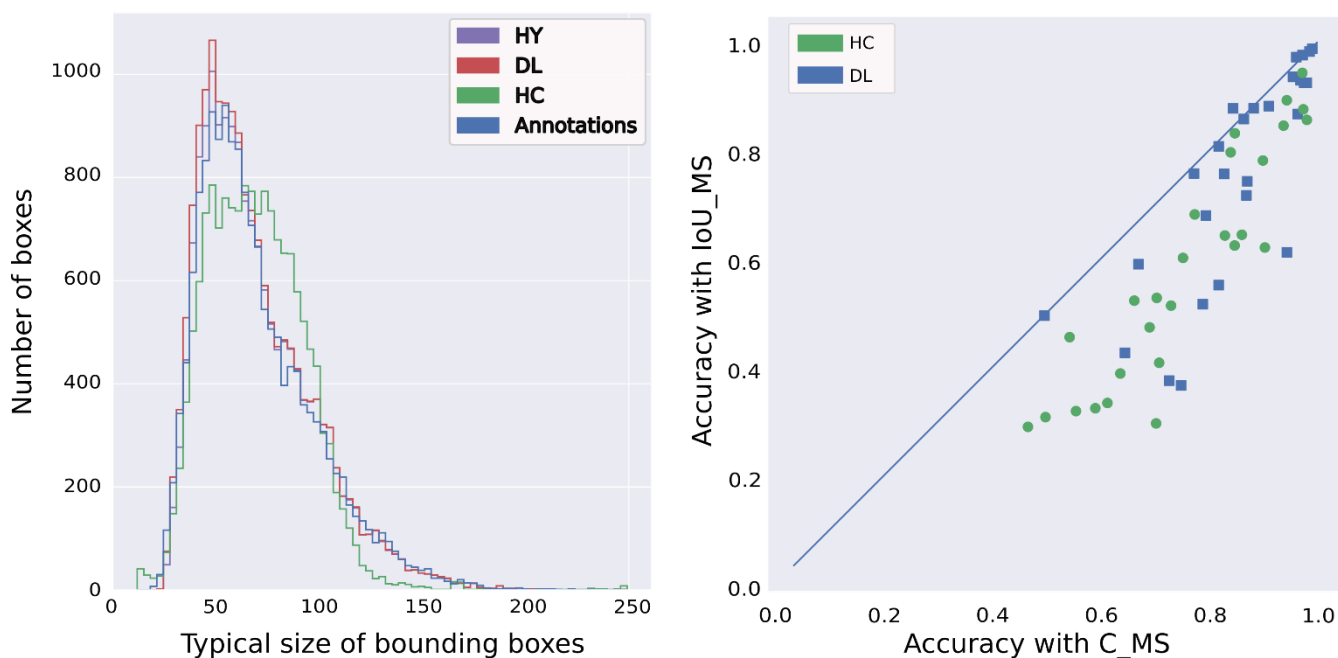

699



700 **Figure S3: Left: distribution of the typical size of BB annotated and those defined around the**  
701 **plants identified by the HC method. Right: comparison of Accuracy computed either with**  
702 **IoU\_MS, and with C\_MS for HC (green discs), and DL methods (blue squares).**

703

704 **Table S4. Complete results for the three methods on all sessions. Accuracy, precision and recall**  
705 **are presented with the IoU matching strategy.**

706

707

708

709
